# Supplementary material for: Urolithin A protects severe acute pancreatitis‐associated acute cardiac injury by regulating mitochondrial fatty acid oxidative metabolism in cardiomyocytes
Source: PubMed Central journal article supplement (PMC10728757; doi:10.1002/mco2.459), 2023-12-19
Supplement: MCO2-4-e459-s001.pdf [file MCO2-4-e459-s001.pdf]

1 **Urolithin A protects severe acute pancreatitis-associated acute**  
2 **cardiac injury by regulating mitochondrial fatty acid oxidative**  
3 **metabolism in cardiomyocytes**

4 Yue Yang<sup>1</sup>, Qian Hu<sup>1</sup>, Hongxin Kang<sup>1</sup>, Juan Li<sup>1</sup>, Xianlin Zhao<sup>1</sup>, Lv Zhu<sup>1</sup>, Wenfu Tang<sup>1</sup>,  
5 Meihua Wan<sup>1,2,\*</sup>

6  
7 <sup>1</sup>Department of Integrated Traditional Chinese and Western Medicine, West China Hospital of Sichuan  
8 University, Chengdu 610041, China

9 <sup>2</sup>West China Hospital (Airport) Hospital of Sichuan University, Chengdu 610299, China

10 **\* Correspondence**

11 Meihua Wan, Department of Integrated Traditional Chinese and Western Medicine, National Clinical  
12 Research Center for Geriatrics, West China Hospital, Sichuan University, 610041, Chengdu, China;  
13 The First People's Hospital of Shuangliu District, Chengdu 610299, China  
14 Email: wanmh@scu.edu.cn (Meihua Wan)

15  
16  
17  
18  
19  
20  
21  
22  
23  
24  
25  
26  
27  
28  
29  
30  
31  
32  
33  
34  
35  
36  
37  
38  
39

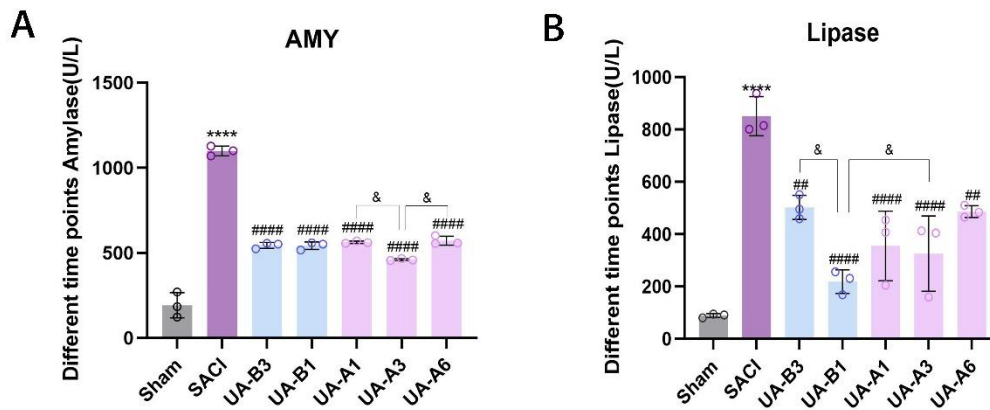

40

41 **FIGURE S1** Exploration of the optimal timing of Urolithin A for SACI. (A-B) Serum amylase  
 42 and lipase levels in the sham group and in the groups with different UA treatment time points (3 h  
 43 before SACI induction, 1 h before SACI induction, 1 h after SACI induction, 3 h after SACI  
 44 induction, 6 h after SACI induction) (n=3). The results are presented as the mean  $\pm$  SD. \*\*\*\*p <  
 45 0.0001 vs. sham group; &p < 0.05 vs. UA-A3 or UA-B1 group; ##p < 0.01, #####p < 0.0001 vs.  
 46 SACI group, by one-way ANOVA tests followed by Tukey tests.

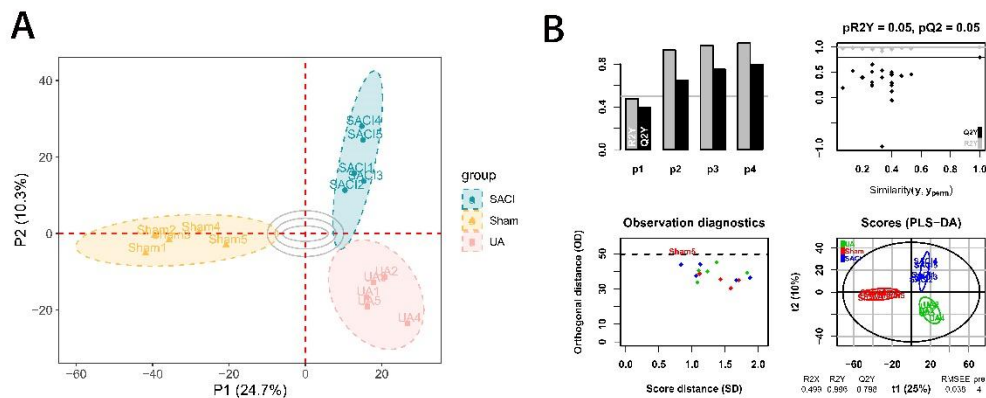

47

48 **FIGURE S2** Untargeted metabolomics analysis. (A) PLS-DA model in the Sham, SACI, UA  
 49 groups (n=5). (B) Validation of the PLS-DA model in the Sham, SACI, and UA groups (n=5).

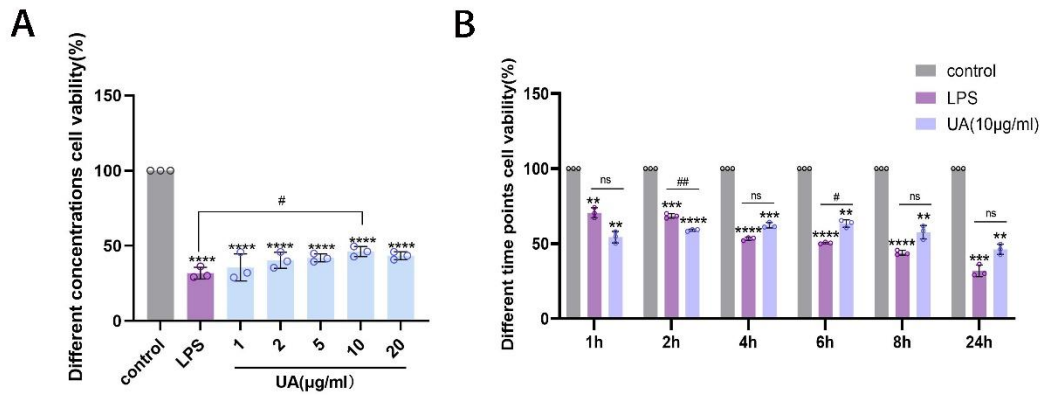

51

52 **FIGURE S3** Detection of primary cardiomyocytes viability using CCK-8 assay. (A) Viability of  
 53 LPS-induced injured cells after treatment by Urolithin A at different concentrations:1, 2, 5, 10 and  
 54 20 µg/mL for 24 h (n=3). (B) Viability of LPS-induced injured cells following treatment by  
 55 Urolithin A (10 µg/ml) at different intervention intervals: 1, 2, 4, 6, 8 and 24 h (n=3). The results  
 56 are presented as the mean ± SD. \*\*p < 0.01, \*\*\*p < 0.005, \*\*\*\*p < 0.0001 vs. control group; #p <  
 57 0.05, ##p < 0.01 vs. LPS group, by one-way ANOVA tests followed by Tukey tests.

58

59

60

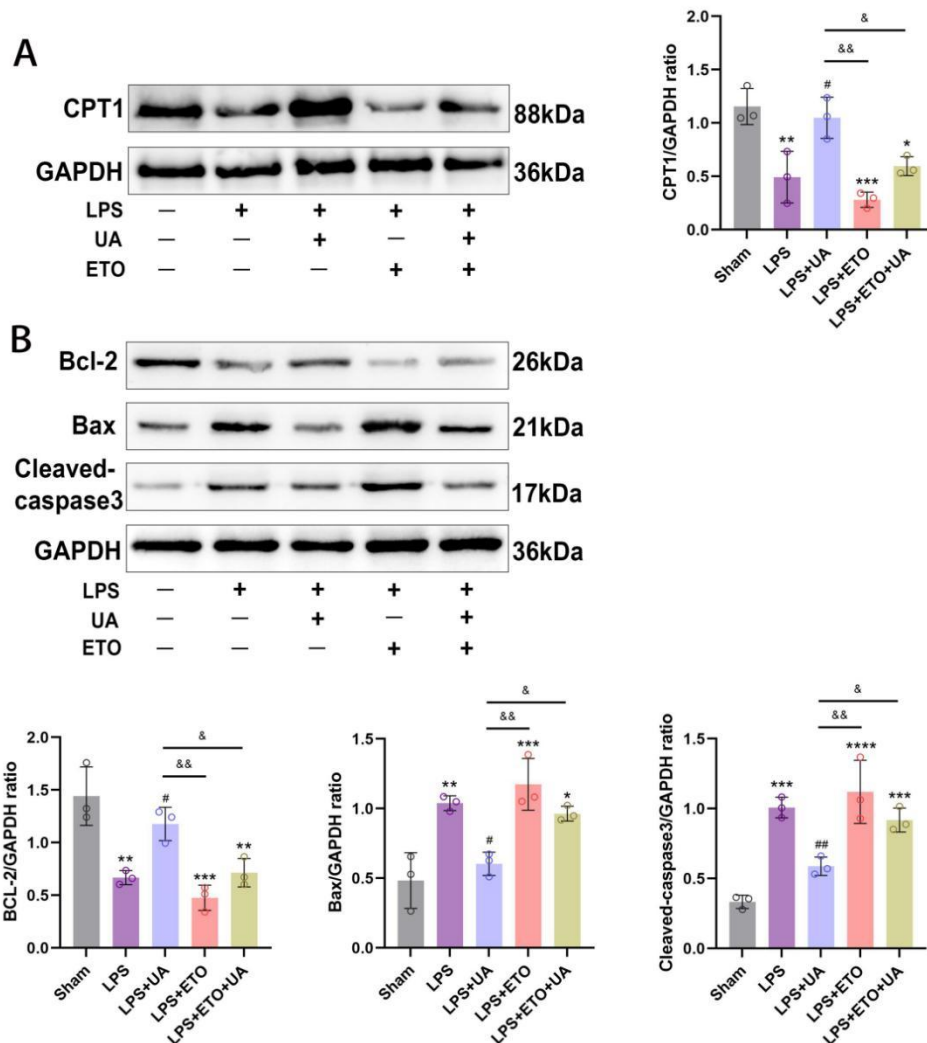

61

62 **FIGURE S4** Urolithin A attenuates cardiomyocyte injury by regulating CPT1. (A) Western  
 63 blotting and quantitative analyses of CPT1 in the sham group (sham), LPS-induced injured group  
 64 (LPS), and LPS plus Urolithin A treatment group (LPS+UA), LPS plus etomoxir inhibitor group  
 65 (LPS+ETO), LPS plus Urolithin A treatment and etomoxir inhibitor group (LPS+ETO+UA) (n=3).  
 66 (B) Western blotting and quantitative analyses of Bcl-2, Bax, Cleaved-Caspase3 in each group  
 67 (n=3). The results are presented as the mean  $\pm$  SD. \*P < 0.05, \*\*P < 0.01, \*\*\*P < 0.005 vs. sham  
 68 group; #p < 0.05, ##p < 0.01 vs. LPS group, &p < 0.05, &&p < 0.01 vs. LPS+UA group, by  
 69 one-way ANOVA tests followed by Tukey tests.

70
